# Supplementary material for: Marine forearc structure of eastern Java and its role in the 1994 Java tsunami earthquake
Source: Copernicus journal article supplement (doi:10.5194/se-2021-61), 2021-05-17
Supplement: Supplementary file 1 [file se-2021-61-supplement.pdf]

1 *Supplement of*

2 **Marine forearc structure of eastern Java and its role in the 1994**  
3 **Java tsunami earthquake**

4

5 **Yueyang Xia et al.**

6

7 *Correspondence to:* Yueyang Xia ([yxia@geomar.de](mailto:yxia@geomar.de))

8

9 The copyright of individual parts of the supplement might differ from the article licence.  
10

11 **Table S 1.** Seismic processing sequences.

| <b>Sequence Step Names</b>                                                                |
|-------------------------------------------------------------------------------------------|
| Normal and Nominal Geometry Establishment with Common Midpoint (CMP) spacing of 6.25 m    |
| Anomalous and Random Noise Attenuation                                                    |
| Offset regularization and Interpolation to Zero Offset                                    |
| Interactive Velocity Analysis in Time Domain                                              |
| Initial Time-domain Velocity building                                                     |
| Shot Interpolation for Aliasing Elimination (from 50 m to 12.5 m shot distance)           |
| Free Surface-Related Multiple Prediction                                                  |
| Multiple Attenuation 1: Frequency-Split 2D Cascaded Adaptive Filter                       |
| 2: Radon Dip Filter                                                                       |
| 3: Inside Mute and Amplitude Clipping                                                     |
| Kirchhoff Pre-stack Time Migration                                                        |
| Initial Depth Domain Velocity Building (Merge with Wide-angle model)                      |
| Kirchhoff Pre-stack Depth Migration with Common Image Point (CIP) gather output (Initial) |
| Iteration Loop:                                                                           |
| CIP Gather Pre-filtering for Non-Rigid-Matching (NRM) Calculation                         |
| NRM Displacement Field Calculation                                                        |
| CIP Gather Residual Move-Out (RMO) Calculation from NRM Field                             |
| Dip and Coherency Field Estimation from Depth Migrated Stack                              |
| Ray-based RMO Depth-Tomography with preconditioning of Dip and Coherency Field            |
| Update the Tomography Model Properties to Reduce the CIP-gather RMO                       |
| Kirchhoff Pre-stack Depth Migration with CIP-gather Output                                |
| Iteration Stopped if RMO is Minimized                                                     |
| Stacking of the Pre-stack Depth Migrated Gathers                                          |

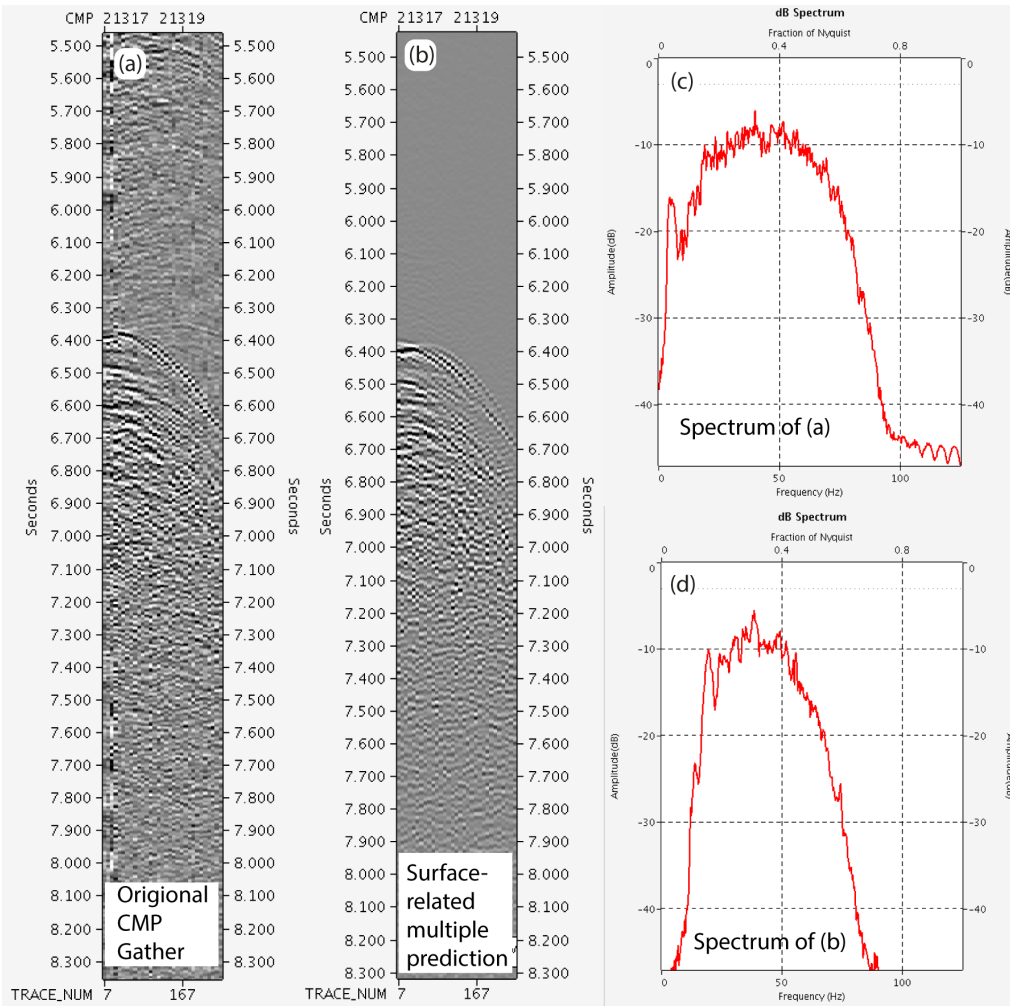

13  
14  
15  
16

**Figure S1.** (a) Original CMP gather with multiple contamination. (b) Free Surface-related predicted multiple model. (c) The frequency spectrum of the original data. (d) The frequency spectrum of the modelled multiple.

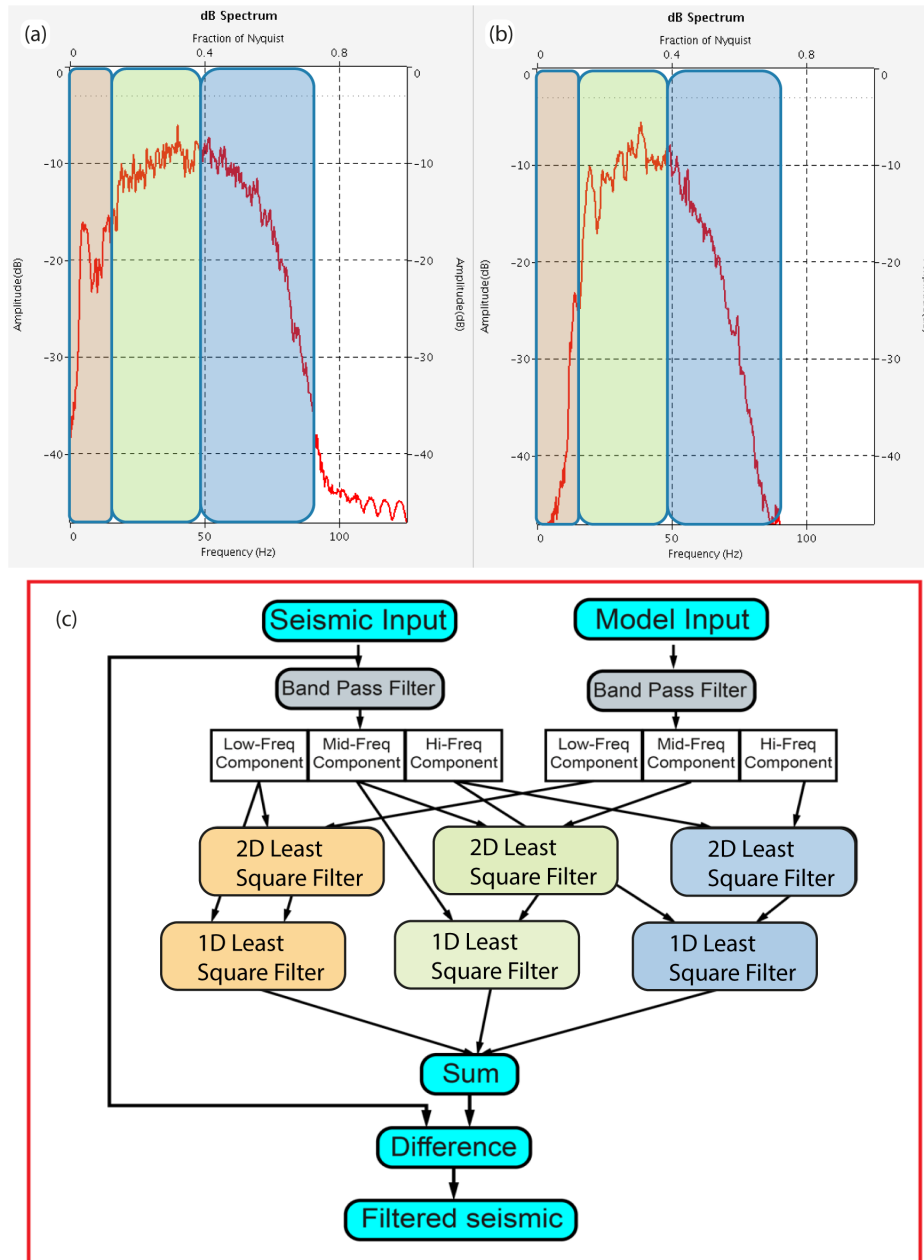

17  
18  
19  
20  
21  
22

**Figure S2.** (a) Frequency bands segmentation of the original data used in the adaptive subtraction. (b) Frequency bands segmentation of the modelled multiple used in the adaptive subtraction. (c) Adaptive subtraction strategy.

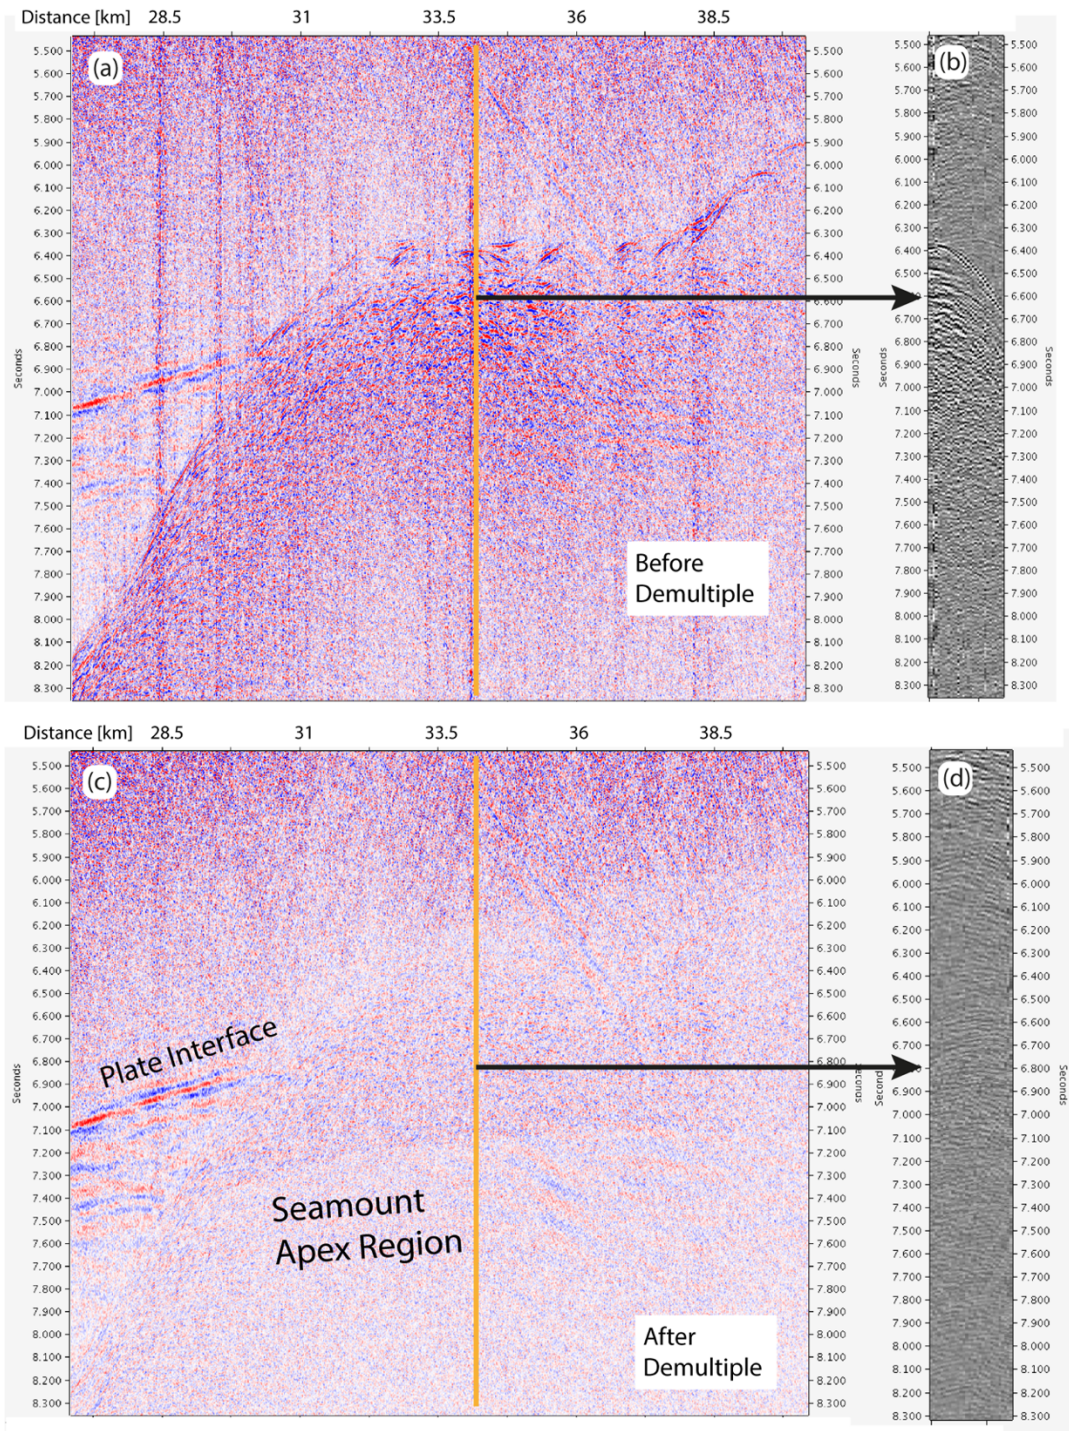

23  
24  
25  
26

**Figure S3.** (a) Original MCS stacked image with multiple contamination. (b) Original CMP gather. (c) MCS stacked section after multiple attenuation. (d) CMP gather after multiple attenuation.



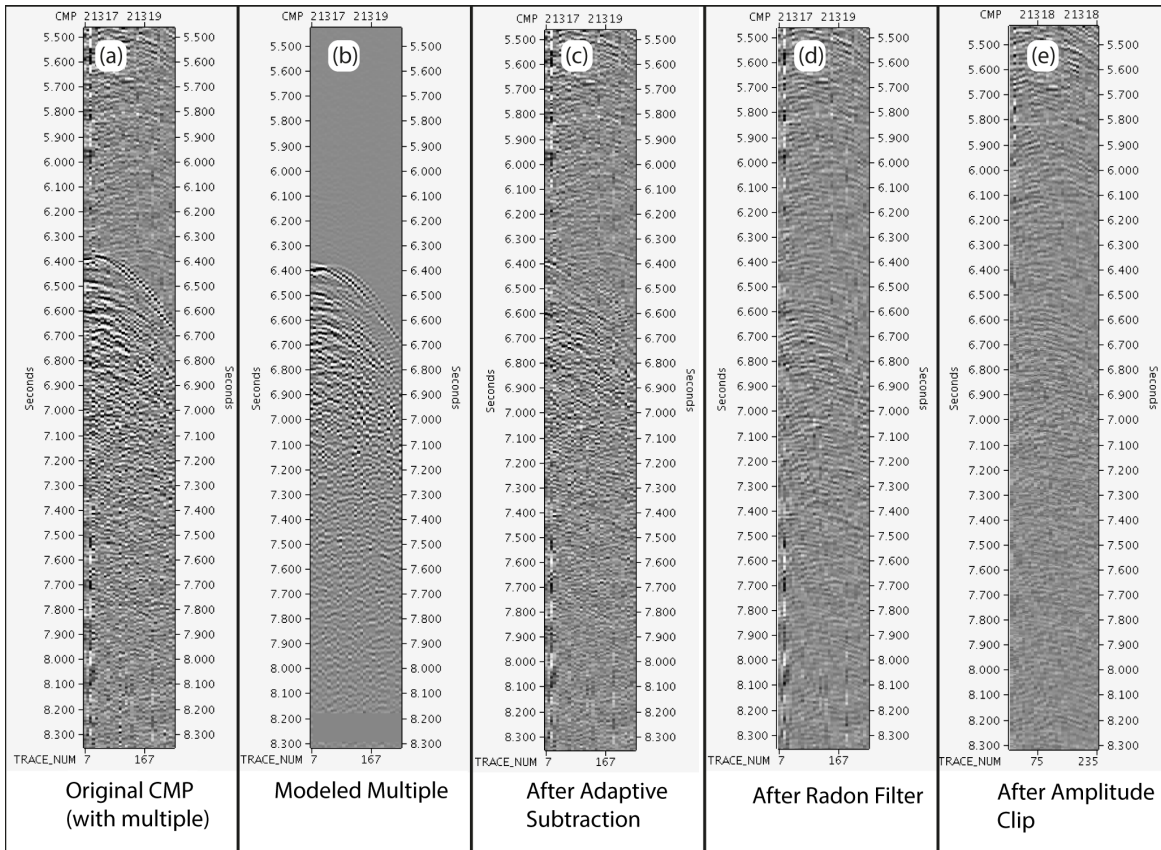

27  
28  
29  
30  
31

**Figure S4.** Multiple attenuation working flow in CMP domain (panels a to e). (a) Original CMP gather with multiple contamination. (b) Surface related modelled multiple. (c) CMP gather after frequency split adaptive subtraction. (d) CMP gather after additional Radon filter. (e) CMP gather after additional amplitude clip.

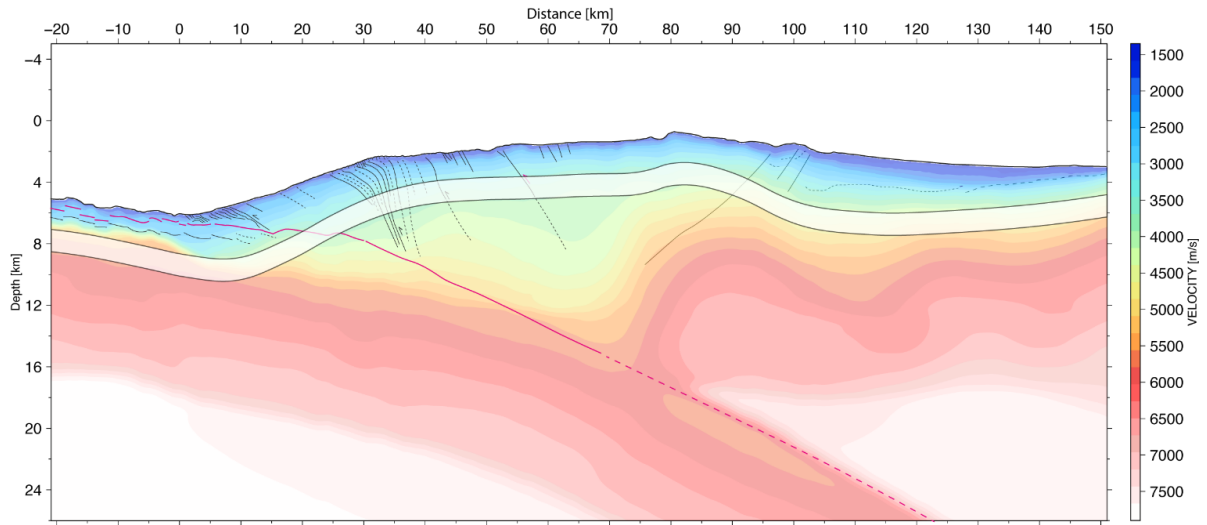

**Figure S5.** The final velocity model merged from the multi-channel seismic velocity analysis (above the white transparent band) and the wide-angle velocity model (Shulgin et al., 2011) (below the white transparent band). The line drawing is based on the final pre-stack depth migrated image.
